# Supplementary material for: The acute effects of simulated hypoxic training at different altitudes on oxidative stress and muscle damage in elite long-distance runners
Source: PeerJ. 2025 May 12;13:e19338. doi: 10.7717/peerj.19338 (PMC12080475; doi:10.7717/peerj.19338)
Supplement: Supplemental Information 1 [file peerj-13-19338-s001.xlsx]

## Sheet: Sheet1
Oxygen Saturation_3min_Normoxia	Oxygen Saturation_6min_Normoxia	Oxygen Saturation_9min_Normoxia	Oxygen Saturation_12min_Normoxia	Heart rate_3min_Normoxia	Heart rate_6min_Normoxia	Heart rate_9min_Normoxia	Heart rate_12min_Normoxia	TAS_Normoxia	TOS_Normoxia	MDA_Normoxia	Creatine Kinase_Normoxia	OSI_Normoxia	Oxygen Saturation_3min_1700m	Oxygen Saturation_6min_1700m	Oxygen Saturation_9min_1700m	Oxygen Saturation_12min_1700m	Heart rate_3min_1700m	Heart rate_6min_1700m	Heart rate_9min_1700m	Heart rate_12min_1700m	TAS_1700m	TOS_1700m	MDA_1700m	Creatine Kinase_1700m	OSI_1700m	Oxygen Saturation_3min_2450m	Oxygen Saturation_6min_2450m	Oxygen Saturation_9min_2450m	Oxygen Saturation_12min_2450m	Heart rate_3min_2450m	Heart rate_6min_2450m	Heart rate_9min_2450m	Heart rate_12min_2450m	TAS_2450m	TOS_2450m	MDA_2450m	Creatine Kinase_2450m	OSI_2450m	Oxygen Saturation_3min_3200m	Oxygen Saturation_6min_3200m	Oxygen Saturation_9min_3200m	Oxygen Saturation_12min_3200m	Heart rate_3min_3200m	Heart rate_6min_3200m	Heart rate_9min_3200m	Heart rate_12min_3200m	TAS_3200m	TOS_3200m	MDA_3200m
96	96	95	95	74	76	76	123	5.55	58.63	4.38	110.65	10.564	94	94	94	93	102	114	134	146	9.89474	87.5667	7.9085	490.811	8.84982	93	89	91	90	106	115	128	147	18.4474	47.9	19.23	157.388	2.59658	78	75	70	68	115	135	147	167	59.2368	57.0667	8.957
97	96	96	97	73	75	76	150	6.38	70.33	5.96	135.23	11.0235	94	95	96	97	121	128	151	180	4.63158	54.0667	8.001	140.703	11.6735	87	88	88	89	127	134	149	154	19.2368	36.0667	6.232	118.71	1.87487	80	80	76	78	115	130	153	164	25.1579	37.0667	9.941
95	94	95	94	71	73	71	126	3.48	62.48	3.28	109.22	17.954	95	94	95	94	95	101	130	148	20.1579	28.5667	5.023	76.494	1.41715	88	89	89	82	104	115	125	152	18.5789	54.0667	9.62455	76.935	2.9101	71	72	78	79	99	116	146	142	28.0526	49.2333	8.957
95	95	94	96	75	75	74	134	7.12	54.33	6.33	139	7.63062	95	95	94	96	106	120	142	154	14.1053	42.9	8.658	155.751	3.04142	93	88	88	82	84	96	125	140	13.3158	62.7333	5.504	165.344	4.7112	76	75	73	69	107	130	162	167	31.8684	36.5667	6.678
96	95	96	96	73	73	76	74	5.24	59.64	4.25	125.55	11.3817	93	93	96	96	82	90	95	94	3.97368	63.9	6.254	160.528	16.0808	92	91	91	95	106	122	135	146	38.9737	50.5667	4.675	157.388	1.29746	88	72	75	69	88	97	143	160	40.4211	52.0667	5.569
97	94	96	96	73	74	73	137	6.32	63.38	4.48	123.63	10.0285	93	94	93	96	92	110	126	157	20.6842	52.9	7.9085	196.18	2.55751	89	91	87	91	90	103	142	145	23.9737	34.5667	14.152	203.874	1.44186	82	79	73	82	106	128	142	157	33.0526	52.5667	8.957
95	94	95	93	75	71	75	153	8.21	66.56	5.33	138.1	8.10719	95	91	95	92	103	122	122	173	40.4211	46.0667	11.913	349.339	1.13967	88	93	89	85	73	102	116	154	15.2895	38.5667	11.465	165.344	2.52243	90	71	77	77	130	138	150	184	37.7895	78.7333	10.364
96	94	96	96	75	74	74	113	4.24	59.62	6.98	126.33	14.0613	95	94	94	96	82	99	117	133	27.6579	49.9	7.677	195.127	1.804	90	92	90	86	115	120	145	166	32.1316	26.7333	5.833	151.011	0.831996	79	79	77	76	108	120	140	162	21.8684	49.2333	10.54
98	96	95	95	70	74	74	123	5.94	54.59	3.96	129.66	9.19024	95	94	94	94	97	127	136	143	12.6579	34.7333	5.35	81.342	2.74401	94	89	90	83	86	97	119	143	24.5	45.0667	8.658	217.015	1.83946	79	67	68	64	84	133	164	182	30.2895	32.7333	8.729
95	93	93	94	75	73	70	150	5.13	55.68	4.55	117.55	10.8538	95	93	90	94	122	127	143	170	19.3684	44.4	8.54	127.344	2.29239	88	82	81	79	63	63	127	105	27.6579	30.7333	11.283	165.827	1.1112	82	67	67	68	78	140	156	167	45.4211	46.7333	9.916
96	95	94	92	76	75	73	152	6.33	62.2	5.05	119.9	9.82622	96	95	93	92	84	97	108	172	27.5263	35.4	8.048	167.766	1.28604	89	78	82	77	74	76	126	171	41.4737	52.4	7.839	152.429	1.26345	86	74	72	69	104	142	177	172	34.8947	54.7333	9.426
97	95	93	96	74	74	73	140	6.02	52.22	6.15	129.2	8.67442	94	94	93	96	105	113	135	160	22.6579	58.4	9.621	212.773	2.57747	90	87	88	86	101	118	130	153	36.8684	34.9	10.999	157.388	0.94661	76	64	62	74	119	153	105	128	40.2895	44.0667	9.45
[truncated: 2 more columns]
